# Supplementary material for: Examining the interplay between mental health indicators and quality of life measures among first-year law students: a cross-sectional study
Source: PeerJ. 2024 Nov 11;12:e18245. doi: 10.7717/peerj.18245 (PMC11562776; doi:10.7717/peerj.18245)
Supplement: Supplemental Information 2 — The statistical analysis was conducted using SPSS, version 23.0. The anonymized raw data used for the regression analysis in the study. The variables: Depression (DEPRESION), Stress (STRES), Anxiety (ANXIETY), Family Support (FS), Emotional Intelligence and Family Influence (EIFI), MBPAQ Total (MBPAQ total),Chronic Daily Stress Actual (CDRS Actual), WHO Disability Assessment Schedule 3.0 (WHOD3). [file peerj-12-18245-s002.xlsx]

## Sheet: Sheet1
Sex	Age	Educational Background	Socioeconomic Status	Living Situation	Physical Activity History	Demographic Location
F	20	High school study	Minimum Wage	He lives in a student dormitory	Reduced physical activity	Urban
M	25	High school study	Minimum Wage	He lives in a student dormitory	Slightly above average physical activity	Urban
F	19	High school study	No income	He lives with his parents	Reduced physical activity	Urban
F	19	High school study	Minimum Wage	He lives in rent	Slightly above average physical activity	Urban
M	22	High school study	Minimum Wage	He lives with his parents	Reduced physical activity	Rural
F	20	High school study	Minimum Wage	He lives with his parents	Slightly above average physical activity	Urban
F	20	High school study	No income	He lives in a student dormitory	Slightly above average physical activity	Urban
M	19	High school study	No income	He lives with his parents	Reduced physical activity	Urban
M	22	High school study	Minimum Wage	He lives in rent	Slightly above average physical activity	Urban
M	22	High school study	No income	He lives with his parents	Reduced physical activity	Rural
M	28	High school study	Minimum Wage	He lives in a student dormitory	Reduced physical activity	Rural
F	19	High school study	No income	He lives in a student dormitory	Slightly above average physical activity	Urban
F	19	High school study	Minimum Wage	He lives with his parents	Reduced physical activity	Rural
F	22	High school study	No income	He lives in a student dormitory	Slightly above average physical activity	Urban
F	21	High school study	Minimum Wage	He lives in rent	Slightly above average physical activity	Urban
M	22	High school study	No income	He lives with his parents	Reduced physical activity	Rural
F	19	High school study	No income	He lives in a student dormitory	Reduced physical activity	Rural
F	20	High school study	No income	He lives in a student dormitory	Slightly above average physical activity	Urban
F	20	High school study	No income	He lives with his parents	Slightly above average physical activity	Rural
F	19	High school study	No income	He lives with his parents	Reduced physical activity	Rural
M	21	High school study	Minimum Wage	He lives with his parents	Slightly above average physical activity	Rural
F	19	High school study	No income	He lives in a student dormitory	Slightly above average physical activity	Urban
F	19	High school study	Minimum Wage	He lives with his parents	Slightly above average physical activity	Urban
M	20	High school study	Minimum Wage	He lives in a student dormitory	Reduced physical activity	Urban
M	25	High school study	No income	He lives with his parents	Slightly above average physical activity	Urban
F	20	High school study	Minimum Wage	He lives in a student dormitory	Slightly above average physical activity	Urban
F	27	High school study	No income	He lives in a student dormitory	Reduced physical activity	Urban
F	20	High school study	Minimum Wage	He lives with his parents	Reduced physical activity	Urban
M	28	High school study	Minimum Wage	He lives with his parents	Reduced physical activity	Urban
M	19	High school study	No income	He lives with his parents	Slightly above average physical activity	Rural
F	19	High school study	No income	He lives with his parents	Reduced physical activity	Urban
M	18	High school study	Minimum Wage	He lives with his parents	Reduced physical activity	Urban
M	29	High school study	Minimum Wage	He lives in rent	Slightly above average physical activity	Urban
F	20	High school study	No income	He lives with his parents	Reduced physical activity	Urban
F	19	High school study	No income	He lives with his parents	Reduced physical activity	Rural
M	28	High school study	Minimum Wage	He lives in rent	Slightly above average physical activity	Urban
F	20	High school study	Minimum Wage	He lives in a student dormitory	Reduced physical activity	Rural
F	19	High school study	Minimum Wage	He lives with his parents	Slightly above average physical activity	Urban
F	20	High school study	No income	He lives with his parents	Slightly above average physical activity	Urban
F	20	High school study	No income	He lives in a student dormitory	Reduced physical activity	Urban
F	19	High school study	No income	He lives with his parents	Reduced physical activity	Rural
M	21	High school study	Minimum Wage	He lives in a student dormitory	Slightly above average physical activity	Rural
F	19	High school study	Minimum Wage	He lives in a student dormitory	Reduced physical activity	Rural
F	19	High school study	Minimum Wage	He lives in a student dormitory	Reduced physical activity	Urban
M	19	High school study	No income	He lives in a student dormitory	Reduced physical activity	Urban
F	22	High school study	No income	He lives in a student dormitory	Slightly above average physical activity	Urban
M	26	High school study	Minimum Wage	He lives in a student dormitory	Slightly above average physical activity	Rural
M	21	High school study	No income	He lives in a student dormitory	Slightly above average physical activity	Urban
M	21	High school study	Minimum Wage	He lives in a student dormitory	Reduced physical activity	Urban
F	19	High school study	Minimum Wage	He lives in rent	Reduced physical activity	Urban
F	20	High school study	No income	He lives with his parents	Slightly above average physical activity	Urban
M	22	High school study	Minimum Wage	He lives in rent	Reduced physical activity	Urban
M	19	High school study	No income	He lives with his parents	Slightly above average physical activity	Urban
M	20	High school study	No income	He lives in a student dormitory	Slightly above average physical activity	Rural
M	19	High school study	Minimum Wage	He lives in a student dormitory	Slightly above average physical activity	Rural
F	26	High school study	Minimum Wage	He lives in rent	Reduced physical activity	Urban
F	25	High school study	Minimum Wage	He lives in a student dormitory	Slightly above average physical activity	Urban
F	20	High school study	Minimum Wage	He lives with his parents	Slightly above average physical activity	Rural
F	29	High school study	No income	He lives with his parents	Slightly above average physical activity	Rural
F	19	High school study	No income	He lives in a student dormitory	Reduced physical activity	Urban
M	19	High school study	Minimum Wage	He lives with his parents	Slightly above average physical activity	Urban
F	20	High school study	Minimum Wage	He lives in a student dormitory	Reduced physical activity	Rural
F	23	High school study	Minimum Wage	He lives in rent	Slightly above average physical activity	Rural
F	19	High school study	Minimum Wage	He lives with his parents	Reduced physical activity	Rural
M	19	High school study	No income	He lives with his parents	Slightly above average physical activity	Urban
F	19	High school study	Minimum Wage	He lives in rent	Slightly above average physical activity	Rural
F	21	High school study	No income	He lives with his parents	Reduced physical activity	Urban
F	19	High school study	Minimum Wage	He lives in rent	Reduced physical activity	Rural
F	20	High school study	Minimum Wage	He lives in a student dormitory	Slightly above average physical activity	Urban
F	19	High school study	Minimum Wage	He lives in rent	Slightly above average physical activity	Urban
F	19	High school study	Minimum Wage	He lives in rent	Reduced physical activity	Rural
M	29	High school study	No income	He lives with his parents	Slightly above average physical activity	Urban
M	20	High school study	No income	He lives with his parents	Reduced physical activity	Urban
F	20	High school study	No income	He lives in a student dormitory	Reduced physical activity	Rural
M	19	High school study	Minimum Wage	He lives in a student dormitory	Reduced physical activity	Urban
